# Supplementary material for: Syntheses, topologies, and luminescence of four Ln–organic polymers constructed from aromatic tetracarboxylic acids
Source: Royal Society of Chemistry journal article supplement (doi:10.1039/c4ce01139b), 2014-01-01
Supplement: c4ce01139b1.pdf [file c4ce01139b1.pdf]

*Electronic Supplementary Information (ESI) for*

## **Syntheses, Topologies, and Luminescence of Four Ln-Organic Polymers Constructed From Aromatic Tetracarboxylic Acids**

Liming Fan,<sup>a,b</sup> Weiliu Fan,<sup>a</sup> Weikuo Song,<sup>b</sup> Guangzeng Liu,<sup>b</sup> Xiutang Zhang,<sup>\*a,b</sup> Xian Zhao<sup>\*a</sup>

<sup>a</sup>State Key Laboratory of Crystal Materials, Shandong University, Jinan 250100, China. <sup>b</sup>Advanced Material Institute of

Research, College of Chemistry and Chemical Engineering, Qilu Normal University, Jinan, 250013, China.

E-mail: xiutangzhang@163.com; zhaoxian@icm.sdu.edu.cn.

ESI

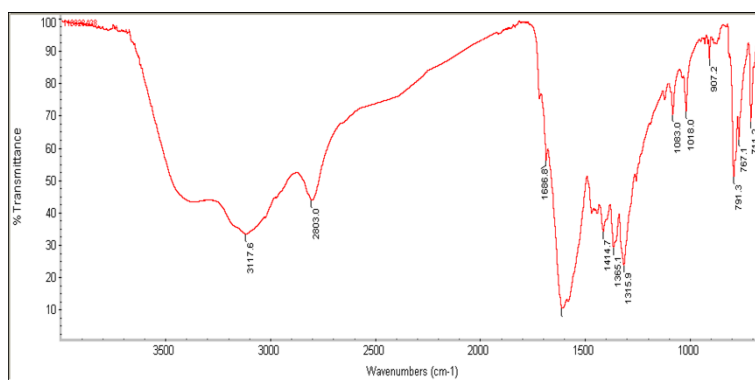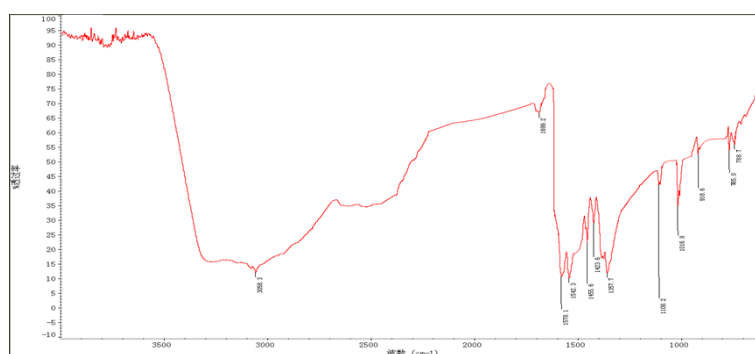

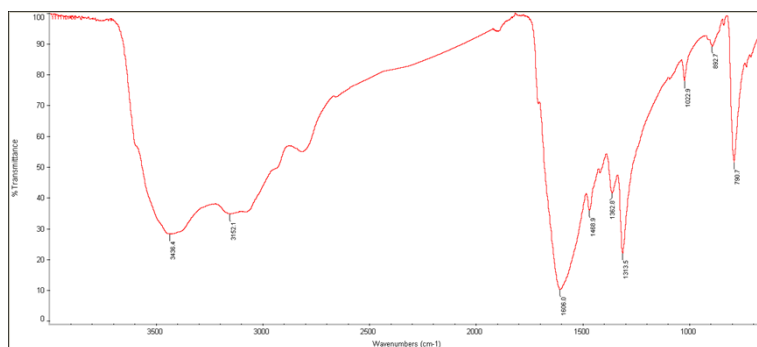

(3)

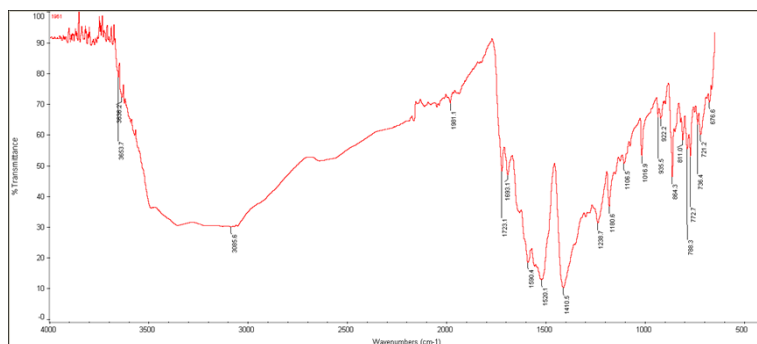

(4)

**Figure S1.** IR spectra of complexes 1-4.

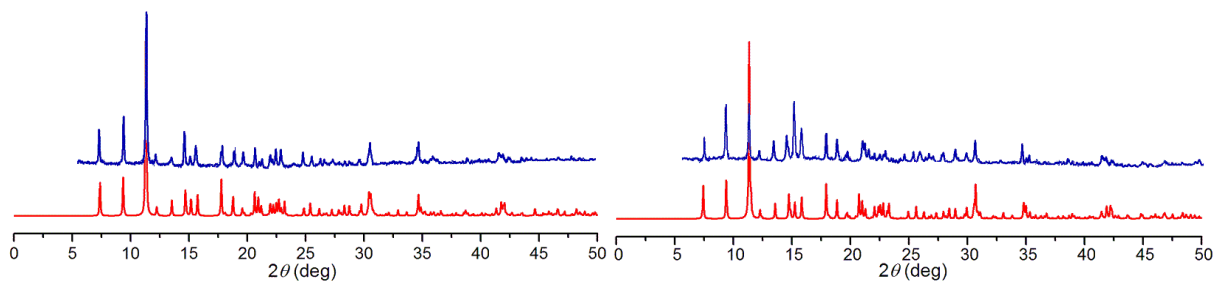

(1)

(2)

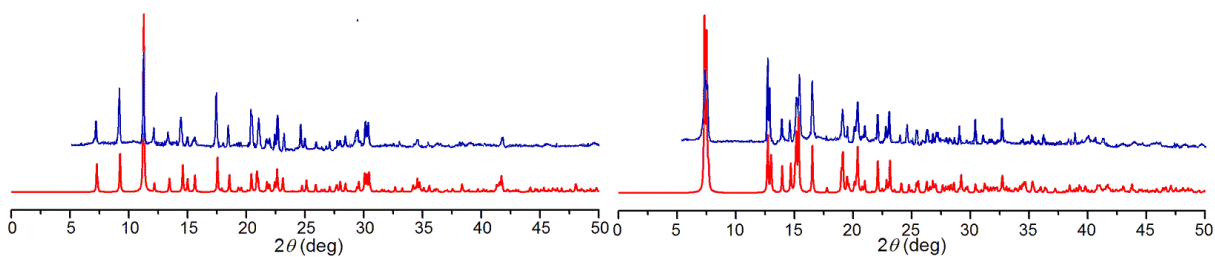

(3)

(4)

**Figure S2.** PXRD patterns of complexes 1-4. Red: calculated from the X-ray single-crystal data; Blue: observed for the as-synthesized solids.

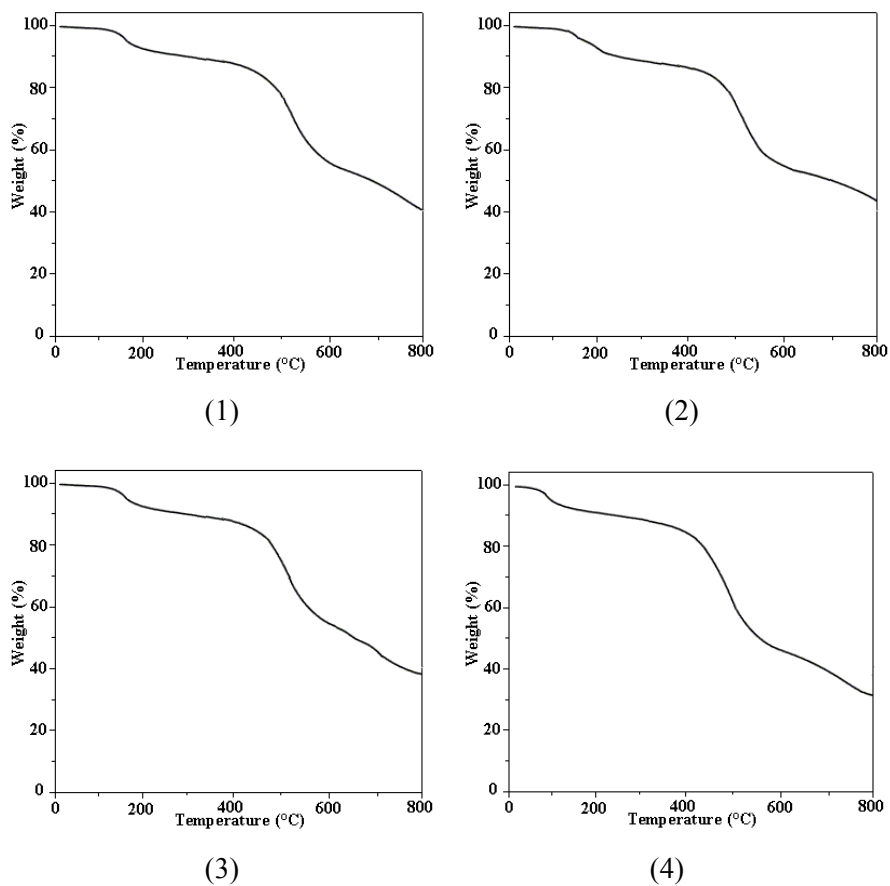

**Figure S3.** TGA curves for complexes 1-4.

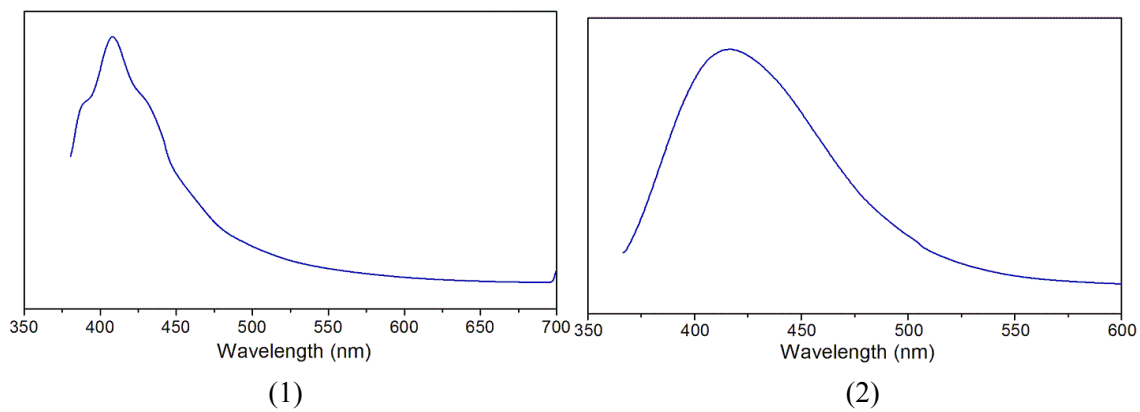

**Figure S4.** Emissionspectra of two ligands (1 for H<sub>4</sub>BPT, 2 for H<sub>4</sub>DCP) in the solid state at room temperature.

**Table S1** Selected bond lengths (Å) and angles (°) for **1 – 4**.

|                                                                                                                                                         |            |                                                |            |                                                |            |                                               |            |
|---------------------------------------------------------------------------------------------------------------------------------------------------------|------------|------------------------------------------------|------------|------------------------------------------------|------------|-----------------------------------------------|------------|
| <b>Complex 1</b>                                                                                                                                        |            |                                                |            |                                                |            |                                               |            |
| Er(1)-O(2)                                                                                                                                              | 2.357(5)   | Er(1)-O(16)                                    | 2.242(4)   | Er(1)-O(14) <sup>#2</sup>                      | 2.309(4)   | Er(1)-O(1)                                    | 2.444(4)   |
| Er(1)-O(12) <sup>#4</sup>                                                                                                                               | 2.383(4)   | Er(1)-O(10) <sup>#1</sup>                      | 2.271(5)   | Er(1)-O(6) <sup>#3</sup>                       | 2.335(4)   | Er(1)-O(8) <sup>#3</sup>                      | 2.503(5)   |
| Er(2)-O(3)                                                                                                                                              | 2.361(4)   | Er(2)-O(13) <sup>#4</sup>                      | 2.268(4)   | Er(2)-O(11) <sup>#6</sup>                      | 2.319(4)   | Er(2)-O(5)                                    | 2.418(4)   |
| Er(2)-O(7)                                                                                                                                              | 2.363(4)   | Er(2)-O(15) <sup>#5</sup>                      | 2.317(4)   | Er(2)-O(4)                                     | 2.387(5)   | Er(2)-O(9)                                    | 2.438(4)   |
| O(16)-Er(1)-O(10) <sup>#1</sup>                                                                                                                         | 77.95(15)  | O(10) <sup>#1</sup> -Er(1)-O(2)                | 144.32(17) | O(2)-Er(1)-O(12) <sup>#4</sup>                 | 83.46(15)  | O(16)-Er(1)-O(8) <sup>#3</sup>                | 72.20(15)  |
| O(16)-Er(1)-O(14) <sup>#2</sup>                                                                                                                         | 117.68(14) | O(14) <sup>#2</sup> -Er(1)-O(2)                | 139.13(15) | O(16)-Er(1)-O(1)                               | 139.24(14) | O(10) <sup>#1</sup> -Er(1)-O(8) <sup>#3</sup> | 76.76(15)  |
| O(10) <sup>#1</sup> -Er(1)-O(14) <sup>#2</sup>                                                                                                          | 73.87(16)  | O(6) <sup>#3</sup> -Er(1)-O(2)                 | 85.60(14)  | O(10) <sup>#1</sup> -Er(1)-O(1)                | 138.16(15) | O(14) <sup>#2</sup> -Er(1)-O(8) <sup>#3</sup> | 145.63(14) |
| O(16)-Er(1)-O(6) <sup>#3</sup>                                                                                                                          | 137.65(18) | O(16)-Er(1)-O(12) <sup>#4</sup>                | 73.35(16)  | O(14) <sup>#2</sup> -Er(1)-O(1)                | 70.90(14)  | O(6) <sup>#3</sup> -Er(1)-O(8) <sup>#3</sup>  | 67.62(18)  |
| O(10) <sup>#1</sup> -Er(1)-O(6) <sup>#3</sup>                                                                                                           | 80.40(14)  | O(10) <sup>#1</sup> -Er(1)-O(12) <sup>#4</sup> | 124.14(16) | O(6) <sup>#3</sup> -Er(1)-O(1)                 | 77.80(16)  | O(2)-Er(1)-O(8) <sup>#3</sup>                 | 67.56(15)  |
| O(14) <sup>#2</sup> -Er(1)-O(6) <sup>#3</sup>                                                                                                           | 90.04(16)  | O(14) <sup>#2</sup> -Er(1)-O(12) <sup>#4</sup> | 78.68(15)  | O(2)-Er(1)-O(1)                                | 68.45(15)  | O(12) <sup>#4</sup> -Er(1)-O(8) <sup>#3</sup> | 133.77(16) |
| O(16)-Er(1)-O(2)                                                                                                                                        | 91.26(15)  | O(6) <sup>#3</sup> -Er(1)-O(12) <sup>#4</sup>  | 147.38(17) | O(12) <sup>#4</sup> -Er(1)-O(1)                | 69.60(15)  | O(1)-Er(1)-O(8) <sup>#3</sup>                 | 125.03(14) |
| O(13) <sup>#4</sup> -Er(2)-O(15) <sup>#5</sup>                                                                                                          | 123.77(15) | O(15) <sup>#5</sup> -Er(2)-O(7)                | 85.28(17)  | O(7)-Er(2)-O(4)                                | 90.31(15)  | O(3)-Er(2)-O(5)                               | 124.28(14) |
| O(13) <sup>#4</sup> -Er(2)-O(11) <sup>#6</sup>                                                                                                          | 82.53(15)  | O(11) <sup>#6</sup> -Er(2)-O(7)                | 81.23(15)  | O(13) <sup>#4</sup> -Er(2)-O(5)                | 73.23(14)  | O(7)-Er(2)-O(5)                               | 67.48(18)  |
| O(15) <sup>#5</sup> -Er(2)-O(11) <sup>#6</sup>                                                                                                          | 73.25(14)  | O(3)-Er(2)-O(7)                                | 77.69(16)  | O(15) <sup>#5</sup> -Er(2)-O(5)                | 139.65(13) | O(4)-Er(2)-O(5)                               | 69.90(14)  |
| O(13) <sup>#4</sup> -Er(2)-O(3)                                                                                                                         | 132.21(14) | O(13) <sup>#4</sup> -Er(2)-O(4)                | 81.42(15)  | O(11) <sup>#6</sup> -Er(2)-O(5)                | 73.59(13)  | O(13) <sup>#4</sup> -Er(2)-O(9)               | 71.96(15)  |
| O(15) <sup>#5</sup> -Er(2)-O(3)                                                                                                                         | 74.22(14)  | O(15) <sup>#5</sup> -Er(2)-O(4)                | 142.22(15) | O(7)-Er(2)-O(9)                                | 146.17(17) | O(15) <sup>#5</sup> -Er(2)-O(9)               | 78.65(15)  |
| O(11) <sup>#6</sup> -Er(2)-O(3)                                                                                                                         | 142.35(14) | O(11) <sup>#6</sup> -Er(2)-O(4)                | 142.99(15) | O(4)-Er(2)-O(9)                                | 84.73(14)  | O(11) <sup>#6</sup> -Er(2)-O(9)               | 121.14(14) |
| O(13) <sup>#4</sup> -Er(2)-O(7)                                                                                                                         | 140.29(18) | O(3)-Er(2)-O(4)                                | 68.19(16)  | O(5)-Er(2)-O(9)                                | 139.37(15) | O(3)-Er(2)-O(9)                               | 69.39(14)  |
| Symmetry codes: #1 x+1/2, -y+1/2, z; #2 -x+1/2, y-1/2, z+1/2; #3 -x, -y, z-1/2; #4 -x, -y+1, z+1/2; #5 x-1/2, -y+1/2, z; #6 -x-1/2, y-1/2, z+1/2.       |            |                                                |            |                                                |            |                                               |            |
| <b>Complex 2</b>                                                                                                                                        |            |                                                |            |                                                |            |                                               |            |
| Yb(1)-O(16)                                                                                                                                             | 2.209(7)   | Yb(1)-O(6) <sup>#4</sup>                       | 2.300(6)   | Yb(1)-O(1)                                     | 2.438(8)   | Yb(1)-O(14) <sup>#3</sup>                     | 2.285(8)   |
| Yb(1)-O(10) <sup>#2</sup>                                                                                                                               | 2.236(8)   | Yb(1)-O(2)                                     | 2.342(8)   | Yb(1)-O(8) <sup>#4</sup>                       | 2.498(8)   | Yb(1)-O(12) <sup>#5</sup>                     | 2.352(7)   |
| Yb(2)-O(13) <sup>#5</sup>                                                                                                                               | 2.238(7)   | Yb(2)-O(4)                                     | 2.368(9)   | Yb(2)-O(11) <sup>#7</sup>                      | 2.293(8)   | Yb(2)-O(3)                                    | 2.336(8)   |
| Yb(2)-O(15) <sup>#6</sup>                                                                                                                               | 2.287(8)   | Yb(2)-O(5)                                     | 2.401(8)   | Yb(2)-O(7)                                     | 2.332(6)   | Yb(2)-O(9)                                    | 2.415(7)   |
| O(16)-Yb(1)-O(10) <sup>#2</sup>                                                                                                                         | 77.1(3)    | O(16)-Yb(1)-O(8) <sup>#4</sup>                 | 71.7(3)    | O(10) <sup>#2</sup> -Yb(1)-O(2)                | 143.8(3)   | O(2)-Yb(1)-O(12) <sup>#5</sup>                | 83.7(3)    |
| O(16)-Yb(1)-O(14) <sup>#3</sup>                                                                                                                         | 117.2(3)   | O(10) <sup>#2</sup> -Yb(1)-O(8) <sup>#4</sup>  | 76.4(3)    | O(14) <sup>#3</sup> -Yb(1)-O(2)                | 139.5(3)   | O(16)-Yb(1)-O(1)                              | 139.9(2)   |
| O(10) <sup>#2</sup> -Yb(1)-O(14) <sup>#3</sup>                                                                                                          | 74.3(3)    | O(14) <sup>#3</sup> -Yb(1)-O(8) <sup>#4</sup>  | 146.0(2)   | O(6) <sup>#4</sup> -Yb(1)-O(2)                 | 85.7(2)    | O(10) <sup>#2</sup> -Yb(1)-O(1)               | 138.1(3)   |
| O(16)-Yb(1)-O(6) <sup>#4</sup>                                                                                                                          | 137.5(3)   | O(6) <sup>#4</sup> -Yb(1)-O(8) <sup>#4</sup>   | 68.1(3)    | O(16)-Yb(1)-O(12) <sup>#5</sup>                | 73.5(3)    | O(14) <sup>#3</sup> -Yb(1)-O(1)               | 70.5(3)    |
| O(10) <sup>#2</sup> -Yb(1)-O(6) <sup>#4</sup>                                                                                                           | 80.7(2)    | O(2)-Yb(1)-O(8) <sup>#4</sup>                  | 67.4(3)    | O(10) <sup>#2</sup> -Yb(1)-O(12) <sup>#5</sup> | 123.9(3)   | O(6) <sup>#4</sup> -Yb(1)-O(1)                | 77.7(3)    |
| O(14) <sup>#3</sup> -Yb(1)-O(6) <sup>#4</sup>                                                                                                           | 90.4(3)    | O(12) <sup>#5</sup> -Yb(1)-O(8) <sup>#4</sup>  | 133.5(3)   | O(14) <sup>#3</sup> -Yb(1)-O(12) <sup>#5</sup> | 78.4(3)    | O(2)-Yb(1)-O(1)                               | 69.3(3)    |
| O(16)-Yb(1)-O(2)                                                                                                                                        | 91.4(3)    | O(1)-Yb(1)-O(8) <sup>#4</sup>                  | 125.8(2)   | O(6) <sup>#4</sup> -Yb(1)-O(12) <sup>#5</sup>  | 147.5(3)   | O(12) <sup>#5</sup> -Yb(1)-O(1)               | 69.8(3)    |
| O(13) <sup>#5</sup> -Yb(2)-O(15) <sup>#6</sup>                                                                                                          | 122.7(3)   | O(11) <sup>#7</sup> -Yb(2)-O(3)                | 141.9(2)   | O(13) <sup>#5</sup> -Yb(2)-O(5)                | 72.9(2)    | O(15) <sup>#6</sup> -Yb(2)-O(9)               | 78.0(3)    |
| O(13) <sup>#5</sup> -Yb(2)-O(11) <sup>#7</sup>                                                                                                          | 81.8(2)    | O(7)-Yb(2)-O(3)                                | 78.1(3)    | O(15) <sup>#6</sup> -Yb(2)-O(5)                | 140.0(2)   | O(11) <sup>#7</sup> -Yb(2)-O(9)               | 120.5(2)   |
| O(15) <sup>#6</sup> -Yb(2)-O(11) <sup>#7</sup>                                                                                                          | 72.7(3)    | O(13) <sup>#5</sup> -Yb(2)-O(4)                | 81.9(3)    | O(11) <sup>#7</sup> -Yb(2)-O(5)                | 74.0(2)    | O(7)-Yb(2)-O(9)                               | 145.9(3)   |
| O(13) <sup>#5</sup> -Yb(2)-O(7)                                                                                                                         | 140.7(3)   | O(15) <sup>#6</sup> -Yb(2)-O(4)                | 142.9(3)   | O(7)-Yb(2)-O(5)                                | 68.4(3)    | O(3)-Yb(2)-O(9)                               | 68.9(3)    |
| O(15) <sup>#6</sup> -Yb(2)-O(7)                                                                                                                         | 85.0(3)    | O(11) <sup>#7</sup> -Yb(2)-O(4)                | 143.0(3)   | O(3)-Yb(2)-O(5)                                | 125.2(2)   | O(4)-Yb(2)-O(9)                               | 85.4(3)    |
| O(11) <sup>#7</sup> -Yb(2)-O(7)                                                                                                                         | 81.1(2)    | O(7)-Yb(2)-O(4)                                | 91.0(3)    | O(4)-Yb(2)-O(5)                                | 69.5(3)    | O(5)-Yb(2)-O(9)                               | 139.5(3)   |
| O(13) <sup>#5</sup> -Yb(2)-O(3)                                                                                                                         | 132.8(2)   | O(3)-Yb(2)-O(4)                                | 69.1(3)    | O(13) <sup>#5</sup> -Yb(2)-O(9)                | 72.4(3)    | O(13) <sup>#5</sup> -Yb(2)-O(3)               | 74.0(3)    |
| Symmetry codes: #2 x-1/2, -y+3/2, z; #3 -x+3/2, y+1/2, z-1/2; #4 -x+2, -y+2, z+1/2; #5 -x+2, -y+1, z-1/2; #6 x+1/2, -y+3/2, z; #7 -x+5/2, y+1/2, z-1/2. |            |                                                |            |                                                |            |                                               |            |
| <b>Complex 3</b>                                                                                                                                        |            |                                                |            |                                                |            |                                               |            |
| Sm(1)-O(16)                                                                                                                                             | 2.307(4)   | Sm(1)-O(14) <sup>#2</sup>                      | 2.370(5)   | Sm(1)-O(2)                                     | 2.434(5)   | Sm(1)-O(1)                                    | 2.474(5)   |
| Sm(1)-O(10) <sup>#1</sup>                                                                                                                               | 2.343(5)   | Sm(1)-O(6) <sup>#3</sup>                       | 2.399(5)   | Sm(1)-O(12) <sup>#4</sup>                      | 2.447(4)   | Sm(1)-O(8) <sup>#3</sup>                      | 2.526(5)   |
| Sm(2)-O(13) <sup>#4</sup>                                                                                                                               | 2.339(4)   | Sm(2)-O(11) <sup>#6</sup>                      | 2.390(4)   | Sm(2)-O(7)                                     | 2.432(4)   | Sm(2)-O(4)                                    | 2.456(5)   |
| Sm(2)-O(15) <sup>#5</sup>                                                                                                                               | 2.390(4)   | Sm(2)-O(3)                                     | 2.408(4)   | Sm(2)-O(5)                                     | 2.454(5)   | Sm(2)-O(9)                                    | 2.504(4)   |
| O(16)-Sm(1)-O(10) <sup>#1</sup>                                                                                                                         | 78.23(17)  | O(10) <sup>#1</sup> -Sm(1)-O(2)                | 144.32(18) | O(2)-Sm(1)-O(12) <sup>#4</sup>                 | 83.42(17)  | O(16)-Sm(1)-O(8) <sup>#3</sup>                | 72.59(16)  |
| O(16)-Sm(1)-O(14) <sup>#2</sup>                                                                                                                         | 119.42(16) | O(14) <sup>#2</sup> -Sm(1)-O(2)                | 139.02(15) | O(16)-Sm(1)-O(1)                               | 138.54(16) | O(10) <sup>#1</sup> -Sm(1)-O(8) <sup>#3</sup> | 76.48(16)  |
| O(10) <sup>#1</sup> -Sm(1)-O(14) <sup>#2</sup>                                                                                                          | 73.55(17)  | O(6) <sup>#3</sup> -Sm(1)-O(2)                 | 84.60(16)  | O(10) <sup>#1</sup> -Sm(1)-O(1)                | 139.38(16) | O(14) <sup>#2</sup> -Sm(1)-O(8) <sup>#3</sup> | 143.85(14) |
| O(16)-Sm(1)-O(6) <sup>#3</sup>                                                                                                                          | 137.04(18) | O(16)-Sm(1)-O(12) <sup>#4</sup>                | 73.57(17)  | O(14) <sup>#2</sup> -Sm(1)-O(1)                | 72.05(15)  | O(6) <sup>#3</sup> -Sm(1)-O(8) <sup>#3</sup>  | 66.12(18)  |
| O(10) <sup>#1</sup> -Sm(1)-O(6) <sup>#3</sup>                                                                                                           | 81.14(16)  | O(10) <sup>#1</sup> -Sm(1)-O(12) <sup>#4</sup> | 124.17(17) | O(6) <sup>#3</sup> -Sm(1)-O(1)                 | 77.63(16)  | O(2)-Sm(1)-O(8) <sup>#3</sup>                 | 67.84(16)  |
| O(14) <sup>#2</sup> -Sm(1)-O(6) <sup>#3</sup>                                                                                                           | 89.51(16)  | O(14) <sup>#2</sup> -Sm(1)-O(12) <sup>#4</sup> | 79.97(17)  | O(2)-Sm(1)-O(1)                                | 67.06(15)  | O(12) <sup>#4</sup> -Sm(1)-O(8) <sup>#3</sup> | 134.67(17) |
| O(16)-Sm(1)-O(2)                                                                                                                                        | 90.73(17)  | O(6) <sup>#3</sup> -Sm(1)-O(12) <sup>#4</sup>  | 147.20(17) | O(12) <sup>#4</sup> -Sm(1)-O(1)                | 69.58(16)  | O(1)-Sm(1)-O(8) <sup>#3</sup>                 | 123.61(14) |
| O(13) <sup>#4</sup> -Sm(2)-O(15) <sup>#5</sup>                                                                                                          | 125.76(15) | O(15) <sup>#5</sup> -Sm(2)-O(7)                | 84.87(18)  | O(7)-Sm(2)-O(5)                                | 66.01(18)  | O(13) <sup>#4</sup> -Sm(2)-O(9)               | 72.76(15)  |
| O(13) <sup>#4</sup> -Sm(2)-O(11) <sup>#6</sup>                                                                                                          | 84.33(15)  | O(11) <sup>#6</sup> -Sm(2)-O(7)                | 79.81(15)  | O(13) <sup>#4</sup> -Sm(2)-O(4)                | 80.89(15)  | O(15) <sup>#5</sup> -Sm(2)-O(9)               | 80.13(15)  |
| O(15) <sup>#5</sup> -Sm(2)-O(11) <sup>#6</sup>                                                                                                          | 73.34(14)  | O(3)-Sm(2)-O(7)                                | 77.52(16)  | O(15) <sup>#5</sup> -Sm(2)-O(4)                | 141.86(15) | O(11) <sup>#6</sup> -Sm(2)-O(9)               | 124.08(15) |
| O(13) <sup>#4</sup> -Sm(2)-O(3)                                                                                                                         | 131.58(15) | O(13) <sup>#4</sup> -Sm(2)-O(5)                | 73.58(16)  | O(11) <sup>#6</sup> -Sm(2)-O(4)                | 142.33(16) | O(3)-Sm(2)-O(9)                               | 68.73(15)  |
| O(15) <sup>#5</sup> -Sm(2)-O(3)                                                                                                                         | 74.87(15)  | O(15) <sup>#5</sup> -Sm(2)-O(5)                | 138.71(14) | O(3)-Sm(2)-O(4)                                | 67.07(17)  | O(7)-Sm(2)-O(9)                               | 145.57(16) |
| O(11) <sup>#6</sup> -Sm(2)-O(3)                                                                                                                         | 142.21(15) | O(11) <sup>#6</sup> -Sm(2)-O(5)                | 73.18(14)  | O(7)-Sm(2)-O(4)                                | 89.25(16)  | O(5)-Sm(2)-O(9)                               | 139.72(15) |
| O(13) <sup>#4</sup> -Sm(2)-O(7)                                                                                                                         | 139.30(18) | O(3)-Sm(2)-O(5)                                | 122.45(15) | O(5)-Sm(2)-O(4)                                | 69.45(16)  | O(4)-Sm(2)-O(9)                               | 83.92(15)  |
| Symmetry codes: #1 x+1/2, -y+1/2, z; #2 -x+1/2, y-1/2, z+1/2; #3 -x, -y, z-1/2; #4 -x, -y+1, z+1/2; #5 x-1/2, -y+1/2, z; #6 -x-1/2, y-1/2, z+1/2.       |            |                                                |            |                                                |            |                                               |            |
| <b>Complex 4</b>                                                                                                                                        |            |                                                |            |                                                |            |                                               |            |
| Gd(1)-O(1)                                                                                                                                              | 2.296(2)   | Gd(1)-O(2) <sup>#2</sup>                       | 2.315(2)   | Gd(1)-O(5) <sup>#3</sup>                       | 2.437(2)   | Gd(1)-O(8) <sup>#4</sup>                      | 2.446(3)   |
| Gd(1)-O(4) <sup>#1</sup>                                                                                                                                | 2.314(2)   | Gd(1)-O(1W)                                    | 2.435(3)   | Gd(1)-O(3) <sup>#2</sup>                       | 2.445(2)   | Gd(1)-O(7) <sup>#4</sup>                      | 2.473(2)   |
| O(1)-Gd(1)-O(4) <sup>#1</sup>                                                                                                                           | 81.53(10)  | O(1)-Gd(1)-O(5) <sup>#3</sup>                  | 72.48(10)  | O(2) <sup>#2</sup> -Gd(1)-O(3) <sup>#2</sup>   | 70.96(8)   | O(1W)-Gd(1)-O(8) <sup>#4</sup>                | 90.94(10)  |
| O(1)-Gd(1)-O(2) <sup>#2</sup>                                                                                                                           | 83.19(9)   | O(4) <sup>#1</sup> -Gd(1)-O(5) <sup>#3</sup>   | 130.99(8)  | O(1W)-Gd(1)-O(3) <sup>#2</sup>                 | 141.12(9)  | O(5) <sup>#3</sup> -Gd(1)-O(8) <sup>#4</sup>  | 127.52(9)  |
| O(4) <sup>#1</sup> -Gd(1)-O(2) <sup>#2</sup>                                                                                                            | 77.18(8)   | O(2) <sup>#2</sup> -Gd(1)-O(5) <sup>#3</sup>   | 136.98(9)  | O(5) <sup>#3</sup> -Gd(1)-O(3) <sup>#2</sup>   | 75.48(8)   | O(3) <sup>#2</sup> -Gd(1)-O(8) <sup>#4</sup>  | 91.75(8)   |
| O(1)-Gd(1)-O(1W)                                                                                                                                        | 97.30(10)  | O(1W)-Gd(1)-O(5) <sup>#3</sup>                 | 72.30(10)  | O(1)-Gd(1)-O(8) <sup>#4</sup>                  | 159.98(10) | O(1)-Gd(1)-O(7) <sup>#4</sup>                 | 146.80(10) |
| O(4) <sup>#1</sup> -Gd(1)-O(1W)                                                                                                                         | 70.71(9)   | O(1)-Gd(1)-O(3) <sup>#2</sup>                  | 93.16(9)   | O(4) <sup>#1</sup> -Gd(1)-O(8) <sup>#4</sup>   | 84.06(8)   | O(4) <sup>#1</sup> -Gd(1)-O(7) <sup>#4</sup>  | 125.38(9)  |
| O(2) <sup>#2</sup> -Gd(1)-O(1W)                                                                                                                         | 147.39(9)  | O(4) <sup>#1</sup> -Gd(1)-O(3) <sup>#2</sup>   | 148.10(8)  | O(2) <sup>#2</sup> -Gd(1)-O(8) <sup>#4</sup>   | 80.11(9)   | O(2) <sup>#2</sup> -Gd(1)-O(7) <sup>#4</sup>  | 118.80(9)  |
| O(1W)-Gd(1)-O(7) <sup>#4</sup>                                                                                                                          | 77.41(10)  | O(5) <sup>#3</sup> -Gd(1)-O(7) <sup>#4</sup>   | 74.74(9)   | O(3) <sup>#2</sup> -Gd(1)-O(7) <sup>#4</sup>   | 73.56(9)   | O(8) <sup>#4</sup> -Gd(1)-O(7) <sup>#4</sup>  | 52.93(8)   |
| Symmetry code: #1 -x+2, -y-1, -z+2; #2 -x+1, -y-1, -z+2; #3 -x+1, -y, -z+1; #4 x-1, y-1, z.                                                             |            |                                                |            |                                                |            |                                               |            |
